# Supplementary material for: Impact of Mental Health First Aid on Confidence Related to Mental Health Literacy: A National Study With a Focus on Race-Ethnicity
Source: Atypon-hosted journal article supplement (doi:10.1176/appi.ps.201400375), 2015-11-02
Supplement: appi.ps.201400375.ds001.pdf [file appi.ps.201400375.ds001.pdf]

## Appendix I

### Nine Items Assessing Mental Health Literacy on Mental Health First Aid Post-Test Feedback Form

Participants are asked to indicate, as a result of the mental health first aid training, the extent to which they feel more confident that they can:

1. Recognize the signs that someone may be dealing with a mental health (MH) problem or crisis
2. Reach out to someone who may be dealing with a MH problem or crisis.
3. Ask a person whether s/he is considering killing her/himself.
4. Actively and compassionately listen to someone in distress.
5. Offer a distressed person basic “first aid” level information and reassurance about MH problems.
6. Assist a person who may be dealing with a MH problem or crisis to seek professional help.
7. Assist a person who may be dealing with a MH problem/crisis to connect with community, peer, and personal supports
8. Be aware of my own views and feelings about MH problems and disorders
9. Recognize and correct misconceptions about MH and mental illness as I encounter them.

## Appendix II

### Demographics for MHFA Participants N = 46,289

| Variable                                  | N      | Percent |
|-------------------------------------------|--------|---------|
| Gender                                    |        |         |
| Male                                      | 9,997  | 21.6    |
| Female                                    | 33,740 | 72.9    |
| Missing                                   | 2,552  | 5.5     |
| Age                                       |        |         |
| 16-24                                     | 4,248  | 9.2     |
| 25-44                                     | 19,771 | 42.7    |
| 45-60                                     | 15,824 | 34.2    |
| 61-80                                     | 4,125  | 8.9     |
| 81+                                       | 82     | 0.2     |
| Missing                                   | 2,239  | 4.8     |
| Race/Ethnicity                            |        |         |
| White                                     | 25,050 | 54.1    |
| Hispanic or Latino                        | 5,117  | 11.0    |
| Asian                                     | 1,233  | 2.7     |
| Black or African American                 | 5,524  | 11.9    |
| American Indian or Alaskan Native         | 1,097  | 2.4     |
| Native Hawaiian or Other Pacific Islander | 184    | 0.4     |
| Missing                                   | 8,084  | 17.5    |

### Appendix III

#### Summary of Total MHL Scores by Gender, Age, and Ethnicity/Race N = 36,263

| Variable                                  | N      | Mean±SD   | P Value |
|-------------------------------------------|--------|-----------|---------|
| Gender                                    |        |           | <.001   |
| Male                                      | 8,245  | 40.6±4.85 |         |
| Female                                    | 28,018 | 41.2±4.96 |         |
| Age                                       |        |           | <.001   |
| 16-24                                     | 3,447  | 41.2±4.80 |         |
| 25-44                                     | 16,176 | 41.0±5.06 |         |
| 45-60                                     | 13,140 | 41.1±4.86 |         |
| 61-80                                     | 3,436  | 40.8±4.75 |         |
| 81+                                       | 64     | 39.6±5.0  |         |
| Race/Ethnicity                            |        |           | <.001   |
| White                                     | 23,861 | 41.0±5.02 |         |
| Hispanic or Latino                        | 4,872  | 41.4±4.65 |         |
| Asian                                     | 1,153  | 41.0±4.40 |         |
| Black or African American                 | 5,175  | 41.3±4.93 |         |
| American Indian or Alaskan Native         | 1,030  | 40.4±4.87 |         |
| Native Hawaiian or Other Pacific Islander | 172    | 41.0±5.23 |         |
